# Supplementary material for: Probiotic Lactobacillus and Bifidobacterium Strains Counteract Adherent-Invasive Escherichia coli (AIEC) Virulence and Hamper IL-23/Th17 Axis in Ulcerative Colitis, but Not in Crohn’s Disease
Source: PubMed Central journal article supplement (PMC7464949; doi:10.3390/cells9081824), 2020-08-01
Supplement: cells-09-01824-s001.pdf [file cells-09-01824-s001.pdf]

# Figure S1

A)

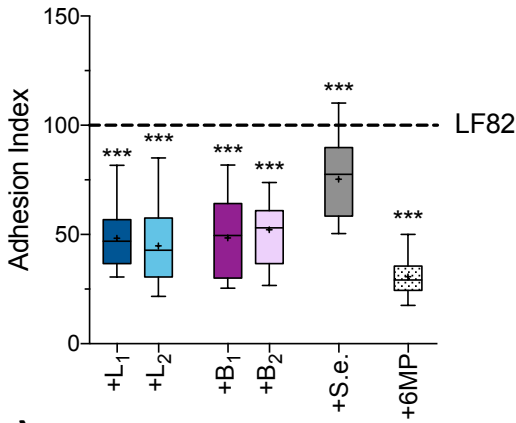

B)

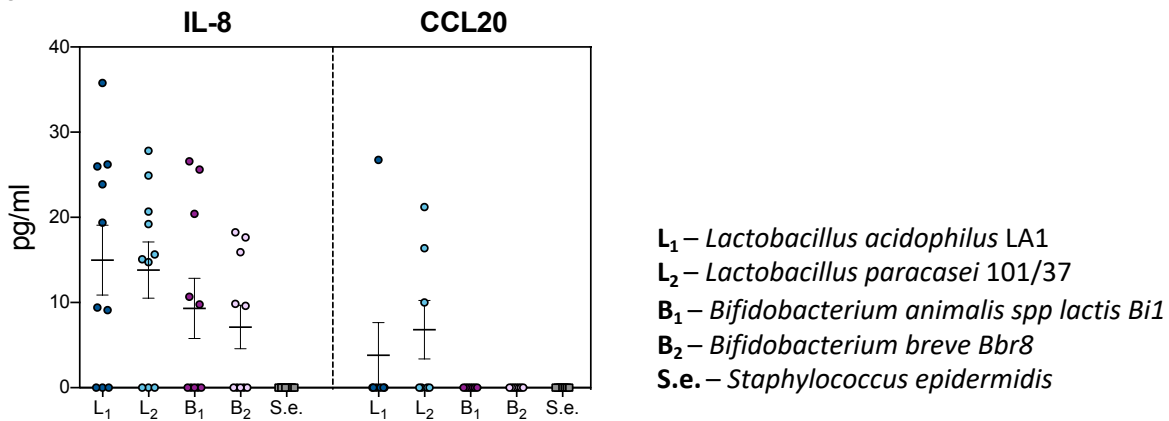

**Figure S1: Biofilm formation in the presence of probiotic strains and cytokine secretion by HT29 cells infected with probiotic strains alone.**

**(A)** Adhesion to abiotic surface of AIEC-LF82 alone (taken as 100%), or in the presence of *Lactobacillus acidophilus* LA1 (+L<sub>1</sub>), *Lactobacillus paracasei* 101/37 (+L<sub>2</sub>), *Bifidobacterium animalis* spp lactis Bi1 (+B<sub>1</sub>), *Bifidobacterium breve* Bbr8 (+B<sub>2</sub>), *S. epidermidis* ATCC-155 (+S.e.) at 1:1 ratio, or in the presence of 6-mercaptopurine (+6MP, 2 µg/ml).

Data are represented with Box-plots showing the median, range and upper and lower quartiles of at least three independent experiments. Means are represented as black cross (+), median as horizontal lines, and outliers are marked as dots. Statistical significance for each condition compared to AIEC-LF82 alone (taken as 100%) was reported (\*p < 0.05, \*\*p < 0.01, \*\*\*p < 0.001).

**(B)** IL-8 and CCL20 secretion by HT29 cell monolayers infected with *Lactobacillus* strains (L<sub>1</sub>, L<sub>2</sub>), or *Bifidobacterium* strains (B<sub>1</sub>, B<sub>2</sub>), or *S. epidermidis* ATCC-155 (S.e.) was quantified by ELISA. Data are represented as mean ± SEM of at least three independent experiments.

# Figure S2

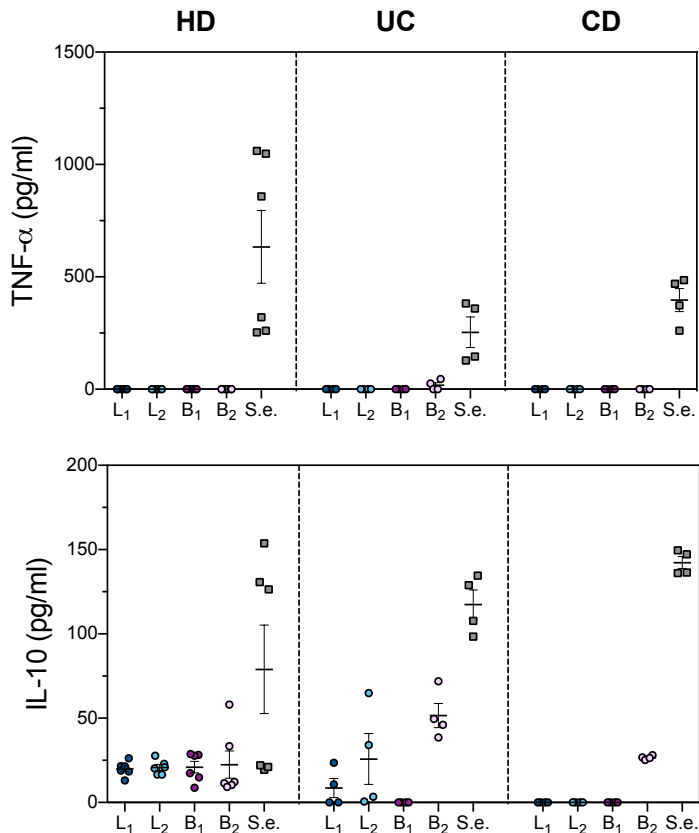

**L<sub>1</sub>** – *Lactobacillus acidophilus* LA1  
**L<sub>2</sub>** – *Lactobacillus paracasei* 101/37  
**B<sub>1</sub>** – *Bifidobacterium animalis* spp lactis Bi1  
**B<sub>2</sub>** – *Bifidobacterium breve* Bbr8  
**S.e.** – *Staphylococcus epidermidis*

**Figure S2: Cytokine secretion by MDM infected with probiotic strains alone.**

TNF-α and IL-10 secretion by MDM derived from HD, UC or CD patients infected with *Lactobacillus* strains (L<sub>1</sub>, L<sub>2</sub>), or *Bifidobacterium* strains (B<sub>1</sub>, B<sub>2</sub>), or *S. epidermidis* ATCC-155 (S.e.) was quantified by ELISA. Data are represented as mean ± SEM of at least three independent experiments.

# Figure S3

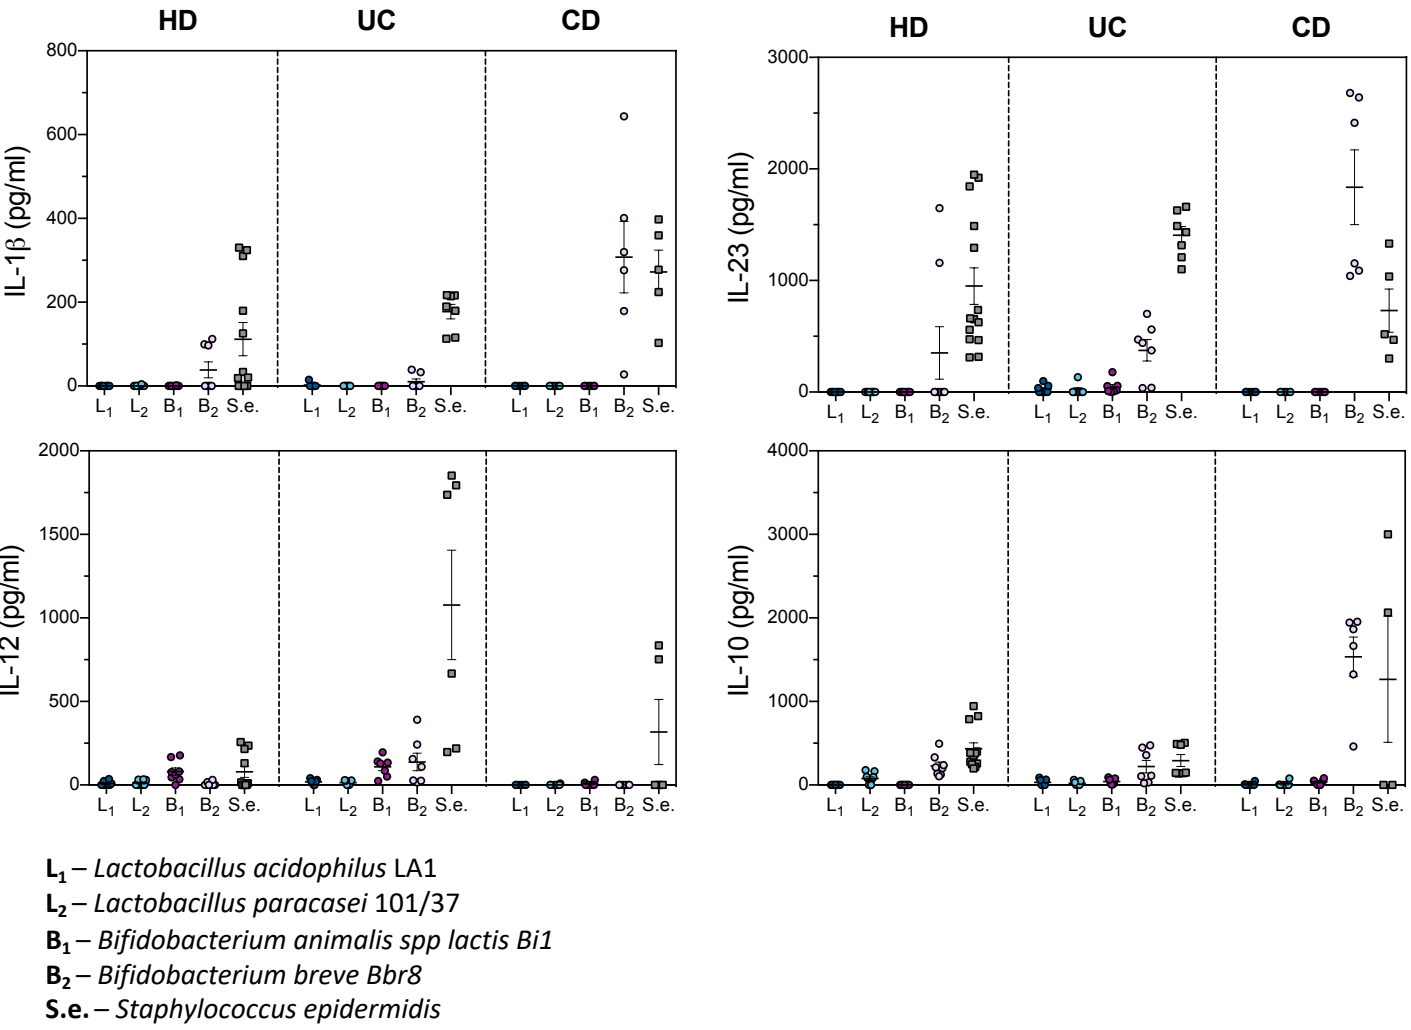

**Figure S3: Cytokine secretion by MoDC infected with probiotic strains alone.**

Secretion of IL-1 $\beta$ , IL-23, IL-12 and IL-10 by MoDC derived from HD, UC or CD patients after 24 hours of infection was quantified by ELISA. MoDC were infected with *Lactobacillus* strains (L<sub>1</sub>, L<sub>2</sub>), or *Bifidobacterium* strains (B<sub>1</sub>, B<sub>2</sub>), or *S. epidermidis* ATCC-155 (S.e.) alone. Data are represented as mean  $\pm$  SEM of at least three independent experiments.

**Table S1: Clinical characteristics of Crohn's disease (CD), Ulcerative colitis (UC) patients and healthy subjects (HD) included in the study.**

| CHARACTERISTICS                            | Healthy Donors (HD) | Ulcerative colitis (UC) | Crohn's disease (CD) |
|--------------------------------------------|---------------------|-------------------------|----------------------|
| - Male n (%)                               | - 4 (40 %)          | - 7 (63.6 %)            | - 4 (50 %)           |
| - Female n (%)                             | - 6 (60 %)          | - 4 (36.4 %)            | - 4 (50 %)           |
| <b>Age year (mean±SEM)</b>                 | 46.40 ± 3.51        | 51.36 ± 5.02            | 48.22 ± 5.41         |
| <b>Mean age at diagnosis (mean±SEM)</b>    | -                   | 35.82 ± 4.74            | 28.89 ± 5.67         |
| <b>Mean duration of disease (mean±SEM)</b> | -                   | 15.64 ± 3.66            | 20 ± 3.70            |
| <b>Former smokers (n, %)</b>               | 4 (40%)             | 2 (18.18%)              | 0 (0%)               |
| <b>Previous surgery n (%)</b>              | -                   | 0 (0%)                  | 6 (75%)              |
| <b>Medical treatment</b>                   |                     |                         |                      |
| - none (n, %)                              | -                   | - 1 (9.09%)             | - 2 (9.09%)          |
| - 5ASA (n, %)                              | -                   | - 8 (72.72%)            | - 6 (72.72%)         |
| - steroids (n, %)                          | -                   | - 2 (18.18%)            | - 0 (0%)             |
| - antibiotics (n, %)                       | -                   | - 0 (0%)                | - 0 (0%)             |

**Table S2: Phagocytosis and survival of AIEC-LF82 within MDM obtained from HD, UC and CD patients.**

| LF82<br>(CFU/ml)             | HD<br>(mean $\pm$ SEM) $\times 10^3$ | UC<br>(mean $\pm$ SEM) $\times 10^3$     | CD<br>(mean $\pm$ SEM) $\times 10^3$                          |
|------------------------------|--------------------------------------|------------------------------------------|---------------------------------------------------------------|
| <b>1h<br/>(phagocytosis)</b> | 208.1 $\pm$ 19.28                    | 197.4 $\pm$ 20.72                        | 82.7 $\pm$ 7.21<br>(** p=0.0011 vs HD)<br>(** p=0.0012 vs UC) |
| <b>8h<br/>post-infection</b> | 175 $\pm$ 2.48                       | 112.4 $\pm$ 16.84<br>(** p=0.0071 vs HD) | 94.53 $\pm$ 8.49<br>(** p=0.0094 vs HD)                       |

The numbers of LF82 cells internalized within MDM were determined after 1h (phagocytosis) or after 8h of infection, and expressed as numbers of CFU/ml (mean  $\pm$  SEM). Data were analyzed by One-way Anova (Dunnett's multiple comparisons):

\*p<0.05, \*\*p<0.01, \*\*\*p<0.001.

**Table S3: Phagocytosis and survival of AIEC-LF82 within MoDC derived from HD, UC and CD patients.**

| LF82<br>(CFU/ml)              | HD<br>(mean $\pm$ SEM) $\times 10^3$ | UC<br>(mean $\pm$ SEM) $\times 10^3$    | CD<br>(mean $\pm$ SEM) $\times 10^3$     |
|-------------------------------|--------------------------------------|-----------------------------------------|------------------------------------------|
| <b>1h<br/>(phagocytosis)</b>  | 436.9 $\pm$ 48.1                     | 228.4 $\pm$ 20.7<br>(* p=0.0152 vs HD)  | 300.5 $\pm$ 47.9                         |
| <b>8h<br/>post-infection</b>  | 391.5 $\pm$ 39.8                     | 219.1 $\pm$ 29.7<br>(** p=0.0325 vs HD) | 141.5 $\pm$ 28.4<br>(*** p<0.0001 vs HD) |
| <b>24h<br/>post-infection</b> | 144.8 $\pm$ 11.6                     | 92.3 $\pm$ 14.7                         | 72.51 $\pm$ 19.3<br>(** p=0.0025 vs HD)  |

The numbers of LF82 cells internalized within MoDC were determined after 1h (phagocytosis), 8h and after 24h of infection, and expressed as numbers of CFU/ml (mean  $\pm$  SEM). Data were analyzed by One-way Anova (Dunnett's multiple comparisons):  
\*p<0.05, \*\*p<0.01, \*\*\*p<0.001.
